# Supplementary material
Source: HighWire-hosted journal article supplement (https://www.cmajopen.ca/highwire/filestream/81405/field_highwire_adjunct_files/0/2019-0147-1-at.pdf)
Supplement: 2019-0147-1-at.pdf [file 2019-0147-1-at.pdf]

**Appendix 1 (as supplied by the authors): Representative HPLC trace overlay of nitroglycerin peaks obtained after NitroStat® tablet storage**

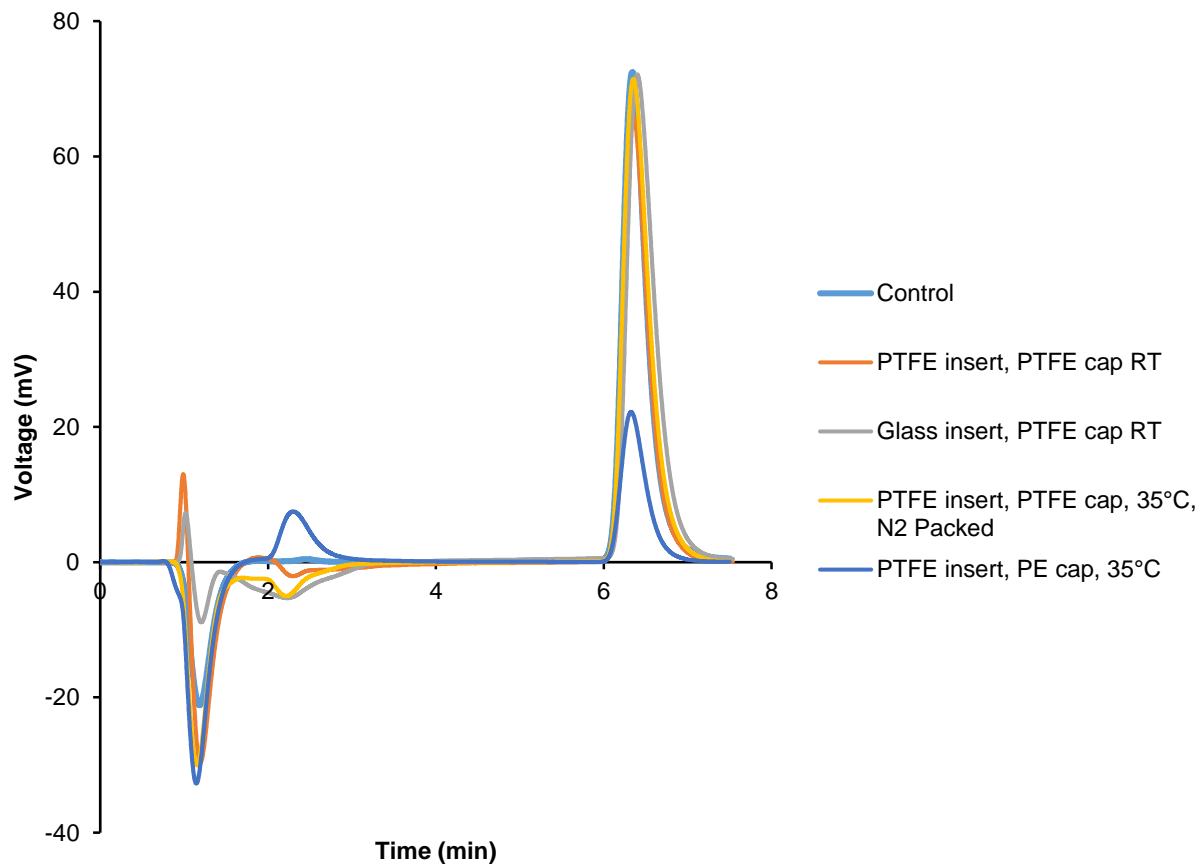

HPLC trace of NitroStat® tablets stored in the original borosilicate glass packaging (control) or in the cap and insert configurations within the SMHeartCard® medication holder for 24 weeks.
